# Supplementary material for: Efa6 protects axons and regulates their growth and branching by inhibiting microtubule polymerisation at the cortex
Source: eLife. 2019 Nov 13;8:e50319. doi: 10.7554/eLife.50319 (PMC6884004; doi:10.7554/eLife.50319)
Supplement: Figure 2—source data 1. [file elife-50319-fig2-data1.xlsx]

## Sheet: Fig.2D
table data											1way Annova
											Number of families	1
											Number of comparisons per family	7
											Alpha	0.05
	wt	Efa6RNAi	Efa6Def	Efa6KO#1	Efa6GX6[w-]	Efa6GX6[w+]	Efa6-FL	Efa6-FL transfected			Dunn's multiple comparisons test	Mean rank diff.	Significant?	Summary	Adjusted P Value	A-?
Number of values	240	120	80	100	120	120	106	66
											wt vs. Efa6RNAi	-111.4	Yes	**	0.002	B	Efa6RNAi
Minimum	0.32	0.55	0.41	0.55	0.34	0.48	0.29	0.24			wt vs. Efa6Def	-104.1	Yes	*	0.0235	C	Efa6Def
25% Percentile	0.73	0.8575	0.81	0.9225	0.77	0.7525	0.5587	0.383			wt vs. Efa6KO#1	-152.4	Yes	****	<0.0001	D	Efa6KO#1
Median	0.985	1.125	1.06	1.21	1.1	1.055	0.7728	0.495			wt vs. Efa6GX6[w-]	-97.07	Yes	*	0.0111	E	Efa6GX6[w-]
75% Percentile	1.21	1.418	1.548	1.558	1.628	1.488	0.9946	0.6983			wt vs. Efa6GX6[w+]	-77.13	No	ns	0.0847	F	Efa6GX6[w+]
Maximum	2.13	2.98	2.95	3.27	2.88	2.54	3.02	1.619			wt vs. Efa6-FL	130.3	Yes	***	0.0003	G	Efa6-FL
											wt vs. Efa6-FL transfected	301.9	Yes	****	<0.0001	H	Efa6-FL transfected
Mean	0.9997	1.183	1.213	1.281	1.236	1.16	0.8348	0.5642
Std. Deviation	0.3541	0.4187	0.5126	0.4902	0.5863	0.4812	0.4103	0.2588
Std. Error of Mean	0.02286	0.03822	0.05731	0.04902	0.05353	0.04393	0.03985	0.03186			Test details	Mean rank 1	Mean rank 2	Mean rank diff.	n1	n2
Lower 95% CI of mean	0.9547	1.107	1.099	1.184	1.13	1.073	0.7557	0.5006			wt vs. Efa6RNAi	451.2	562.6	-111.4	240	120
Upper 95% CI of mean	1.045	1.259	1.327	1.378	1.342	1.247	0.9138	0.6278			wt vs. Efa6Def	451.2	555.3	-104.1	240	80
											wt vs. Efa6KO#1	451.2	603.6	-152.4	240	100
Sum	239.9	142	97.06	128.1	148.3	139.2	88.48	37.24			wt vs. Efa6GX6[w-]	451.2	548.3	-97.07	240	120
											wt vs. Efa6GX6[w+]	451.2	528.3	-77.13	240	120
											wt vs. Efa6-FL	451.2	320.9	130.3	240	106
											wt vs. Efa6-FL transfected	451.2	149.3	301.9	240	66
