# Supplementary material for: Efa6 protects axons and regulates their growth and branching by inhibiting microtubule polymerisation at the cortex
Source: eLife. 2019 Nov 13;8:e50319. doi: 10.7554/eLife.50319 (PMC6884004; doi:10.7554/eLife.50319)
Supplement: Figure 3—figure supplement 2—source data 1. [file elife-50319-fig3-figsupp2-data1.xlsx]

## Sheet: Fig.3-fig sup 2D
table data											1way Annova
	MTs intact	moderate MT defects	MT networks gone								Number of families	1
Number of values	29	66	18								Number of comparisons per family	3
											Alpha	0.05
Minimum	2	3	35
25% Percentile	4	10.75	66								Dunn's multiple comparisons test	Mean rank diff.	Significant?	Summary	Adjusted P Value
Median	5	18	86.5
75% Percentile	7.5	32	115.5								MTs intact vs. mild MT defects	-37.81	Yes	****	<0.0001	A-B
Maximum	11	77	229								MTs intact vs. MTs gone	-80.65	Yes	****	<0.0001	A-C
											mild MT defects vs. MTs gone	-42.84	Yes	****	<0.0001	B-C
Mean	5.793	22.65	95
Std. Deviation	2.351	16.76	46.1
Std. Error of Mean	0.4366	2.063	10.87								Test details	Mean rank 1	Mean rank 2	Mean rank diff.	n1	n2
Lower 95% CI of mean	4.899	18.53	72.07								MTs intact vs. mild MT defects	22.07	59.88	-37.81	29	66
Upper 95% CI of mean	6.687	26.77	117.9								MTs intact vs. MTs gone	22.07	102.7	-80.65	29	18
											mild MT defects vs. MTs gone	59.88	102.7	-42.84	66	18
Sum	168	1495	1710
