# Supplementary material for: Efa6 protects axons and regulates their growth and branching by inhibiting microtubule polymerisation at the cortex
Source: eLife. 2019 Nov 13;8:e50319. doi: 10.7554/eLife.50319 (PMC6884004; doi:10.7554/eLife.50319)
Supplement: Figure 3—figure supplement 7—source data 1. [file elife-50319-fig3-figsupp7-data1.xlsx]

## Sheet: Fig.3-fig sup 7F
	data
		GFP	Efa6-FL-GFP	Efa6-Cterm-GFP	Efa6-Nterm-GFP	PSD(1)-FL-GFP
	w/ ruffles	5	100	3	124	87
	w/o ruffles	137	24	84	10	16
	statistics
	Table Analyzed	contingency-FL
	P value and statistical significance
	Test	Chi-square				Chi-square				Chi-square				Chi-square				Chi-square
	Chi-square, df	164.8, 1				0.0008492, 1				219.4, 1				7.96, 1				166.8, 1
	z	12.84				0.02914				14.81				2.821				12.92
	P value	<0.0001				0.9768				<0.0001				0.0048				<0.0001
	P value summary	****				ns				****				**				****
	One- or two-sided	Two-sided				Two-sided				Two-sided				Two-sided				Two-sided
	Statistically significant (P < 0.05)?	Yes				No				Yes				Yes				Yes
	Data analyzed	GFP	Efa6-FL-GFP	Total		GFP	Efa6-Cterm-GFP	Total		GFP	Efa6-Nterm-GFP	Total		Efa6-FL-GFP	Efa6-Nterm-GFP	Total		GFP	PSD(1)-FL-GFP	Total
	w/ ruffles	5	100	105		5	3	8		5	124	129		100	124	224		5	87	92
	w/o ruffles	137	24	161		137	84	221		137	10	147		24	10	34		137	16	153
	Total	142	124	266		142	87	229		142	134	276		124	134	258		142	103	245
	Percentage of row total	GFP	Efa6-FL-GFP			GFP	Efa6-Cterm-GFP			GFP	Efa6-Nterm-GFP			Efa6-FL-GFP	Efa6-Nterm-GFP			GFP	PSD(1)-FL-GFP
	w/ ruffles	4.76%	95.24%			62.50%	37.50%			3.88%	96.12%			44.64%	55.36%			5.43%	94.57%
	w/o ruffles	85.09%	14.91%			61.99%	38.01%			93.20%	6.80%			70.59%	29.41%			89.54%	10.46%
	Percentage of column total	GFP	Efa6-FL-GFP			GFP	Efa6-Cterm-GFP			GFP	Efa6-Nterm-GFP			Efa6-FL-GFP	Efa6-Nterm-GFP			GFP	PSD(1)-FL-GFP
	w/ ruffles	3.52%	80.65%			3.52%	3.45%			3.52%	92.54%			80.65%	92.54%			3.52%	84.47%
	w/o ruffles	96.48%	19.35%			96.48%	96.55%			96.48%	7.46%			19.35%	7.46%			96.48%	15.53%
	Percentage of grand total	GFP	Efa6-FL-GFP			GFP	Efa6-Cterm-GFP			GFP	Efa6-Nterm-GFP			Efa6-FL-GFP	Efa6-Nterm-GFP			GFP	PSD(1)-FL-GFP
	w/ ruffles	1.88%	37.59%			2.18%	1.31%			1.81%	44.93%			38.76%	48.06%			2.04%	35.51%
	w/o ruffles	51.50%	9.02%			59.83%	36.68%			49.64%	3.62%			9.30%	3.88%			55.92%	6.53%
