# Supplementary material for: Efa6 protects axons and regulates their growth and branching by inhibiting microtubule polymerisation at the cortex
Source: eLife. 2019 Nov 13;8:e50319. doi: 10.7554/eLife.50319 (PMC6884004; doi:10.7554/eLife.50319)
Supplement: Figure 3—source data 1. [file elife-50319-fig3-data1.xlsx]

## Sheet: Fig.3B
		data												Chi Square Test Results
		neurons													control	Full length	NTerm	NTerm SxIP	NTerm short	MTBD	N	C	NTermCAAX
			control	Full length	NTerm	NTerm SxIP	NTerm short	MTBD	N	C	NTermCAAX			control	n/a	<0.0001	<0.0001	<0.0001	0.0154	<0.0001	0.9414	<0.0001	<0.0001
		w/ axon	339	232	240	259	449	322	357	137	359			Full length		n/a	<0.0001					<0.0001
		w/o axon	123	174	360	374	226	317	128	246	258
		fibroblasts
			control	Full length	NTerm	NTerm SxIP	NTerm short	MTBD	N	C	NTermCAAX				control	Full length	NTerm	NTerm SxIP	NTermDMTBD	MTBD	N	C	NTermCAAX
		no MT defects	77	25	18	27	136	32	143	35	19			control	n/a	<0.0001	<0.0001	<0.0001	0.3289	<0.0001	0.8343	<0.0001	<0.0001
		mild MT defects	10	59	36	42	27	90	17	51	62			Full length		n/a	<0.0001					0.0003
		MTs gone	0	16	46	53	2	23	0	53	19			NTerm			n/a
														NTerm SxIP				n/a
														NTerm short					n/a
														MTBD						n/a
														N							n/a
														C								n/a
														NTermCAAX									n/a

## Sheet: Fig.3C
		raw data
			GFP	Dmel Efa6-FL	Hsap PSD1	Hsap PSD2	Hsap PSD3	Hsap PSD4	Cele Efa6
		no MT defects	105	25	86	63	74	57	6
		mild MT defects	9	59	27	23	26	10	70
		MTs gone	1	16	0	0	0	0	61
		Chi Square Test Results
			control	Dmel Efa6-FL	Hsap PSD1	Hsap PSD2	Hsap PSD3	Hsap PSD4	Cele Efa6
		control	n/a	<0.0001	0.003	0.001	0.001	0.25	<0.0001

## Sheet: Fig.3D
		raw data
			GFP	Dmel Efa6-NTerm	Hsap PSD1-NTerm	Cele Efa6-NTerm
		no MT defects	105	18	77	4
		mild MT defects	9	36	19	58
		MTs gone	1	46	0	43
		Chi Square Test Results
			GFP	Dmel Efa6-NTerm	Hsap PSD1-NTerm	Cele Efa6-NTerm
		control	n/a	<0.0001	0.27	<0.0001

## Sheet: Fig.3E
		data
			GFP	Dmel MTBD-GFP	C.ele MTBD-GFP	Hsap MTBD-GFP
		no MT defects	105	10	31	79
		mild MT defects	9	28	43	18
		MTs gone	1	7	4	1
		Chi Square Test Results
			GFP	Dmel Efa6-NTerm	Hsap PSD1-NTerm	Cele Efa6-NTerm
		control	n/a	<0.0001	0.069	<0.0001
