# Supplementary material for: Efa6 protects axons and regulates their growth and branching by inhibiting microtubule polymerisation at the cortex
Source: eLife. 2019 Nov 13;8:e50319. doi: 10.7554/eLife.50319 (PMC6884004; doi:10.7554/eLife.50319)
Supplement: Figure 4—figure supplement 1—source data 1. [file elife-50319-fig4-figsupp1-data1.xlsx]

## Sheet: Fig.4-fig sup 1A
	column statistics							1-way ANOVA
		MCAK	Efa6-Cterm-GFP	MT only
	Number of values	40	50	21				Number of families	1
								Number of comparisons per family	3
	Minimum	4.976	2.067	0.017				Alpha	0.05
	25% Percentile	9.114	3.889	0.05654
	Median	11.64	5.21	0.067				Dunn's multiple comparisons test	Mean rank diff.	Significant?	Summary	Adjusted P Value
	75% Percentile	15.46	6.265	0.08952
	Maximum	23.93	12.56	0.1502				MCAK vs. Efa6-Cterm-GFP	40.77	Yes	****	<0.0001	A-B
								MCAK vs. MT only	78.15	Yes	****	<0.0001	A-C
	Mean	12.85	5.39	0.07388				Efa6-Cterm-GFP vs. MT only	37.38	Yes	****	<0.0001	B-C
	Std. Deviation	4.931	2.063	0.03172
	Std. Error of Mean	0.7796	0.2918	0.006921
								Test details	Mean rank 1	Mean rank 2	Mean rank diff.	n1	n2
	Lower 95% CI of mean	11.28	4.804	0.05944
	Upper 95% CI of mean	14.43	5.977	0.08831				MCAK vs. Efa6-Cterm-GFP	89.15	48.38	40.77	40	50
								MCAK vs. MT only	89.15	11	78.15	40	21
	Sum	514.2	269.5	1.551				Efa6-Cterm-GFP vs. MT only	48.38	11	37.38	50	21

## Sheet: Fig.4-fig sup 1B
	column statistics							1-way ANOVA
		MCAK	Efa6-Cterm-GFP	MT only
	Number of values	18	20	13				Number of families	1
								Number of comparisons per family	3
	Minimum	1.758	0.0066	0.0135				Alpha	0.05
	25% Percentile	1.973	0.01641	0.02337
	Median	2.121	0.02421	0.03378				Dunn's multiple comparisons test	Mean rank diff.	Significant?	Summary	Adjusted P Value
	75% Percentile	2.219	0.03896	0.03707
	Maximum	2.466	0.0588	0.04871				MCAK vs. Efa6-Cterm-GFP	26.6	Yes	****	<0.0001	A-B
								MCAK vs. MT only	23.81	Yes	****	<0.0001	A-C
	Mean	2.121	0.02819	0.03141				Efa6-Cterm-GFP vs. MT only	-2.792	No	ns	>0.9999	B-C
	Std. Deviation	0.1715	0.01424	0.01048
	Std. Error of Mean	0.04043	0.003185	0.002906
								Test details	Mean rank 1	Mean rank 2	Mean rank diff.	n1	n2
	Lower 95% CI of mean	2.036	0.02152	0.02508
	Upper 95% CI of mean	2.207	0.03485	0.03774				MCAK vs. Efa6-Cterm-GFP	42.5	15.9	26.6	18	20
								MCAK vs. MT only	42.5	18.69	23.81	18	13
	Sum	38.18	0.5637	0.4084				Efa6-Cterm-GFP vs. MT only	15.9	18.69	-2.792	20	13
