# Supplementary material for: Efa6 protects axons and regulates their growth and branching by inhibiting microtubule polymerisation at the cortex
Source: eLife. 2019 Nov 13;8:e50319. doi: 10.7554/eLife.50319 (PMC6884004; doi:10.7554/eLife.50319)
Supplement: Figure 4—source data 1. [file elife-50319-fig4-data1.xlsx]

## Sheet: Fig.4D
		# MTs polymerising into 1um range of PM							Table Analyzed	polymerising MTs within 1um
			GFP	efa6-FL-GFP	efa6-NtermCAAX-GFP
		Number of values	73	90	90				Column B	efa6-FL-GFP	efa6-NtermCAAX-GFP
									vs.	vs.	vs.
		Minimum	2	0	0				Column A	GFP	GFP
		25% Percentile	5	0	0
		Median	8	0	0.5				Mann Whitney test
		75% Percentile	11	1	2				P value	<0.0001	<0.0001
		Maximum	21	9	10				Exact or approximate P value?	Exact	Exact
		Range	19	9	10				P value summary	****	****
									Significantly different (P < 0.05)?	Yes	Yes
		Mean	8.712	1.011	1.311				One- or two-tailed P value?	Two-tailed	Two-tailed
		Std. Deviation	4.474	1.928	1.858				Sum of ranks in column A,B	9056 , 4310	9044 , 4323
		Std. Error of Mean	0.5236	0.2033	0.1959				Mann-Whitney U	215	227.5
									Difference between medians
									Median of column A	8.000, n=73	8.000, n=73
									Median of column B	0.000, n=90	0.5000, n=90
									Difference: Actual	-8	-7.5
									Difference: Hodges-Lehmann	-7	-7

## Sheet: Fig.4E
		Distance [um] MTs polymerise into GFP positive area within 120s							Table Analyzed	comet length in GFP positive areas
			GFP	efa6-FL-GFP	Efa6-Nterm-CAAX
		Number of values	224	238	197				Column B	efa6-FL-GFP	Efa6-Nterm-CAAX
									vs.	vs.	vs.
		Minimum	0	0.1087	0.13				Column A	GFP	GFP
		25% Percentile	1.691	0.3437	0.3899
		Median	2.759	0.4836	0.5076				Mann Whitney test
		75% Percentile	3.869	0.6894	0.716				P value	<0.0001	<0.0001
		Maximum	8.603	1.941	2.212				Exact or approximate P value?	Approximate	Approximate
		Range	8.603	1.832	2.082				P value summary	****	****
									Significantly different (P < 0.05)?	Yes	Yes
		Mean	2.983	0.5566	0.574				One- or two-tailed P value?	Two-tailed	Two-tailed
		Std. Deviation	1.709	0.3202	0.2763				Sum of ranks in column A,B	76540 , 30414	67778 , 21054
		Std. Error of Mean	0.1142	0.02076	0.01968				Mann-Whitney U	1973	1551
									Difference between medians
									Median of column A	2.759, n=224	2.759, n=224
									Median of column B	0.4836, n=238	0.5076, n=197
									Difference: Actual	-2.275	-2.251
									Difference: Hodges-Lehmann	-2.221	-2.203

## Sheet: Fig.4F
	tubulin pull-down assay
		band intensity
	tubulin input	37254
	con beads (no peptide)	13190
	MTED	36349
	scrambled MTED	6642
	no MCAK	44.4785
	AMPPNP MCAK	65.9507
	ADP MCAK	70.7092
	tubulin input	109.513

## Sheet: Fig.4H
		control	MTED	scrambled MTED	MCAK
	Number of values	10	10	10	10				Number of families	1
									Number of comparisons per family	3
	Minimum	390.3	17.08	370.8	0.824				Alpha	0.05
	25% Percentile	431.2	32.41	400.2	1.449
	Median	492.9	40.62	426.7	3.31				Dunn's multiple comparisons test	Mean rank diff.	Significant?	Summary	Adjusted P Value	A-?
	75% Percentile	536.5	57.15	520.6	6.885				control vs. MTED	16.6	Yes	**	0.0045	B	MTED
	Maximum	543.5	84.73	559.5	17.26				control vs. scrambled MTED	3	No	ns	>0.9999	C	scrambled MTED
	Range	153.2	67.65	188.6	16.44				control vs. MCAK	26.4	Yes	****	<0.0001	D	MCAK
	Mean	484	44.95	450.2	4.82				Test details	Mean rank 1	Mean rank 2	Mean rank diff.	n1	n2	Z
	Std. Deviation	53.75	19.7	69.52	4.909				control vs. MTED	32	15.4	16.6	10	10	3.175
	Std. Error of Mean	17	6.231	21.98	1.552				control vs. scrambled MTED	32	29	3	10	10	0.5738
									control vs. MCAK	32	5.6	26.4	10	10	5.05
