# Supplementary material for: Efa6 protects axons and regulates their growth and branching by inhibiting microtubule polymerisation at the cortex
Source: eLife. 2019 Nov 13;8:e50319. doi: 10.7554/eLife.50319 (PMC6884004; doi:10.7554/eLife.50319)
Supplement: Figure 5—source data 1. [file elife-50319-fig5-data1.xlsx]

## Sheet: Fig.5 comet number
		Numbers									Statistics
			control for Efa6GX6[w-]	Efa6GX6[w-]	control for Efa6KO#1	Efa6KO#1	sca-GAL4	sca-GAL4;Efa6-FL			Table Analyzed	EB1 number total	EB1 number total	EB1 number total
		Number of values	18	17	67	58	125	123
											Column	Efa6GX6[w-]	Efa6KO#1	sca-GAL4;Efa6-FL
		Minimum	0.1951	0.628	0.1989	0.2874	0	0			vs.	vs.	vs.	vs.
		25% Percentile	0.6326	0.9268	0.6707	0.8623	0.581	0.2261			Column	control for Efa6GX6[w-]	control for Efa6KO#1	sca-GAL4
		Median	0.9512	1.415	0.8949	1.15	0.9046	0.581
		75% Percentile	1.293	1.78	1.293	1.437	1.356	0.9046			Mann Whitney test
		Maximum	1.932	2.077	2.188	3.257	2.905	2.324			P value	0.0474	0.026	<0.0001
											Exact or approximate P value?	Exact	Exact	Approximate
		Mean	1	1.354	1	1.246	1	0.6362			P value summary	*	*	****
		Std. Deviation	0.4503	0.472	0.4456	0.5901	0.5681	0.485			Significantly different (P < 0.05)?	Yes	Yes	Yes
		Std. Error of Mean	0.1061	0.1145	0.05444	0.07748	0.05081	0.04373			One- or two-tailed P value?	Two-tailed	Two-tailed	Two-tailed
											Sum of ranks in column A,B	264 , 366	3773 , 4103	18671 , 12206
		Lower 95% CI of mean	0.7761	1.111	0.8913	1.091	0.8994	0.5496			Mann-Whitney U	93	1495	4580
		Upper 95% CI of mean	1.224	1.596	1.109	1.402	1.101	0.7228
											Difference between medians
		Sum	18	23.01	67	72.3	125	78.25			Median of column A	0.9512, n=18	0.8949, n=67	0.9046, n=125
											Median of column B	1.415, n=17	1.15, n=58	0.581, n=123
											Difference: Actual	0.4634	0.2548	-0.3236
											Difference: Hodges-Lehmann	0.3818	0.1916	-0.3548

## Sheet: Fig.5J comet# in GCfp
		Numbers									Statistics
			control forEfa6GX6[w-]	Efa6GX6[w-]	control for Efa6KO#1	Efa6KO#1	sca-GAL4	sca-GAL4;Efa6-FL			Table Analyzed	Ratio EB1 comets enter GC filopodia
		Number of values	18	17	67	58	125	123
											Column	Efa6GX6[w-]	Efa6KO#1	sca-GAL4;Efa6-FL
		Minimum	0.2201	1.13	0	0.3796	0	0			vs.	vs.	vs.	vs.
		25% Percentile	0.8657	1.382	0.7803	0.9833	0.547	0			Column	control forEfa6GX6[w-]	control for Efa6KO#1	sca-GAL4
		Median	1.009	1.5	1.003	1.265	1.094	0.4134
		75% Percentile	1.131	1.636	1.302	1.46	1.502	1.033			Mann Whitney test
		Maximum	1.681	1.82	1.821	1.951	3.282	4.134			P value	<0.0001	0.002	<0.0001
											Exact or approximate P value?	Exact	Exact	Approximate
		Mean	1	1.509	1	1.226	1	0.5733			P value summary	****	**	****
		Std. Deviation	0.3253	0.1799	0.4005	0.3496	0.6315	0.7483			Significantly different (P < 0.05)?	Yes	Yes	Yes
		Std. Error of Mean	0.07667	0.04362	0.04893	0.0459	0.05648	0.06748			One- or two-tailed P value?	Two-tailed	Two-tailed	Two-tailed
											Sum of ranks in column A,B	198 , 432	3601 , 4274	18749 , 12127
		Lower 95% CI of mean	0.8382	1.417	0.9023	1.135	0.8882	0.4398			Mann-Whitney U	27	1323	4501
		Upper 95% CI of mean	1.162	1.602	1.098	1.318	1.112	0.7069
											Difference between medians
		Sum	18	25.66	67	71.13	125	70.52			Median of column A	1.009, n=18	1.003, n=67	1.094, n=125
											Median of column B	1.5, n=17	1.265, n=58	0.4134, n=123
											Difference: Actual	0.4907	0.2622	-0.6807
											Difference: Hodges-Lehmann	0.5101	0.2229	-0.547

## Sheet: Fig.5K
		Numbers									Statistics
			control	Efa6GX6[w-]	Efa6GX6[w+]	sca-GAL4;Efa6-FL					Table Analyzed	MT in filopodia GC
		Number of values	60	60	60	87
											Column	Efa6GX6[w-]	Efa6GX6[w+]	sca-GAL4;Efa6-FL
		Minimum	0.25	0.37	0.43	0					vs.	vs.	vs.	vs.
		25% Percentile	0.525	0.75	0.75	0					Column	control	control	control
		Median	0.75	1.43	1.255	0.2696
		75% Percentile	1.2	2	1.71	0.8087					Mann Whitney test
		Maximum	3	3	6.99	3.577					P value	0.0001	0.0004	<0.0001
											Exact or approximate P value?	Exact	Exact	Exact
		Mean	1.002	1.46	1.412	0.497					P value summary	***	***	****
		Std. Deviation	0.7228	0.7775	0.9784	0.6747					Significantly different (P < 0.05)?	Yes	Yes	Yes
		Std. Error of Mean	0.09331	0.1004	0.1263	0.07234					One- or two-tailed P value?	Two-tailed	Two-tailed	Two-tailed
											Sum of ranks in column A,B	2908 , 4352	2969 , 4291	5702 , 5176
		Lower 95% CI of mean	0.8148	1.259	1.159	0.3532					Mann-Whitney U	1078	1139	1348
		Upper 95% CI of mean	1.188	1.661	1.665	0.6408
											Difference between medians
		Sum	60.09	87.58	84.72	43.24					Median of column A	0.75, n=60	0.75, n=60	0.75, n=60
											Median of column B	1.43, n=60	1.255, n=60	0.2696, n=87
											Difference: Actual	0.68	0.505	-0.4804
											Difference: Hodges-Lehmann	0.45	0.36	-0.5

## Sheet: Fig.5L
		Numbers									Statistics
			control	Efa6GX6[w-]	Efa6GX6[w+]	sca-GAL4;Efa6-FL					Table Analyzed	Neurons w/ MTs in GC filopodia
		with MTs	192	116	118	20
		without MTs	42	4	2	26					P value and statistical significance
											Test	Chi-square				Chi-square				Chi-square
											Chi-square, df	14.99, 1				19.32, 1				31.11, 1
											z	3.871				4.395				5.577
											P value	0.0001				<0.0001				<0.0001
											P value summary	***				****				****
											One- or two-sided	Two-sided				Two-sided				Two-sided
											Statistically significant (P < 0.05)?	Yes				Yes				Yes
											Data analyzed	control	Efa6GX6[w-]	Total		control	Efa6GX6[w+]	Total		control	sca-GAL4;Efa6-FL	Total
											with MTs	192	116	308		192	118	310		192	20	212
											without MTs	42	4	46		42	2	44		42	26	68
											Total	234	120	354		234	120	354		234	46	280
											Percentage of row total	control	Efa6GX6[w-]			control	Efa6GX6[w+]			control	sca-GAL4;Efa6-FL
											with MTs	62.34%	37.66%			61.94%	38.06%			90.57%	9.43%
											without MTs	91.30%	8.70%			95.45%	4.55%			61.76%	38.24%
											Percentage of column total	control	Efa6GX6[w-]			control	Efa6GX6[w+]			control	sca-GAL4;Efa6-FL
											with MTs	82.05%	96.67%			82.05%	98.33%			82.05%	43.48%
											without MTs	17.95%	3.33%			17.95%	1.67%			17.95%	56.52%
											Percentage of grand total	control	Efa6GX6[w-]			control	Efa6GX6[w+]			control	sca-GAL4;Efa6-FL
											with MTs	54.24%	32.77%			54.24%	33.33%			68.57%	7.14%
											without MTs	11.86%	1.13%			11.86%	0.56%			15.00%	9.29%

## Sheet: Fig.5M
		Numbers (comet lifetime)									Statistics (comet lifetime)
			control for Efa6GX6[w-]	Efa6GX6[w-]	control for Efa6GX6[w-]	Efa6GX6[w-]					Table Analyzed	Lifetime	Lifetime
		Number of values	47	42	132	242
											Column	Efa6GX6[w-]	Efa6GX6[w-]
		Minimum	0.1983	0.1983	0	0					vs.	vs.	vs.
		25% Percentile	0.3966	0.7932	0	1.067					Column	control for Efa6GX6[w-]	control for Efa6GX6[w-]
		Median	0.7932	1.19	0.3557	2.28
		75% Percentile	1.19	1.834	1.778	4.55					Mann Whitney test
		Maximum	4.363	4.363	10.63	22.77					P value	0.0014	<0.0001
											Exact or approximate P value?	Exact	Approximate
		Mean	1	1.44	1	3.364					P value summary	**	****
		Std. Deviation	0.8166	0.8782	1.476	3.355					Significantly different (P < 0.05)?	Yes	Yes
		Std. Error of Mean	0.1191	0.1355	0.1284	0.2157					One- or two-tailed P value?	Two-tailed	Two-tailed
											Sum of ranks in column A,B	1733 , 2273	15875 , 54250
		Lower 95% CI of mean	0.7602	1.166	0.7463	2.939					Mann-Whitney U	604.5	7097
		Upper 95% CI of mean	1.24	1.714	1.254	3.789
											Difference between medians
		Sum	47	60.49	132.1	814.1					Median of column A	0.7932, n=47	0.3557, n=132
											Median of column B	1.19, n=42	2.28, n=242
											Difference: Actual	0.3966	1.924
											Difference: Hodges-Lehmann	0.3966	1.52
		Numbers (comet velocity)									Statistics (comet velocity)
			wt	Efa6GX6[w-]							Table Analyzed	Velocity
		Number of values	47	42
											Column	Efa6GX6[w-]
		Minimum	0.3623	0.3259							vs.	vs.
		25% Percentile	0.7229	0.7353							Column	wt
		Median	0.9468	1.036
		75% Percentile	1.234	1.38							Mann Whitney test
		Maximum	2.178	2.379							P value	0.514
											Exact or approximate P value?	Exact
		Mean	1	1.095							P value summary	ns
		Std. Deviation	0.3812	0.5271							Significantly different (P < 0.05)?	No
		Std. Error of Mean	0.05561	0.08133							One- or two-tailed P value?	Two-tailed
											Sum of ranks in column A,B	2035 , 1970
		Lower 95% CI of mean	0.8881	0.9311							Mann-Whitney U	907
		Upper 95% CI of mean	1.112	1.26
											Difference between medians
		Sum	47	46							Median of column A	0.9468, n=47
											Median of column B	1.036, n=42
											Difference: Actual	0.08945
											Difference: Hodges-Lehmann	0.06127
