# Supplementary material for: Efa6 protects axons and regulates their growth and branching by inhibiting microtubule polymerisation at the cortex
Source: eLife. 2019 Nov 13;8:e50319. doi: 10.7554/eLife.50319 (PMC6884004; doi:10.7554/eLife.50319)
Supplement: Figure 6—source data 1. [file elife-50319-fig6-data1.xlsx]

## Sheet: Fig.6A
	column statistics									Mann-Whitney Test
		control	Efa6GX6[w-]	wt	Efa6KO#1	sca-GAL4	sca-GAL4;Efa6-FL			Table Analyzed	EB1 number in Axon
	Number of values	22	18	72	57	123	124
										Column B	Efa6GX6[w-]	Efa6KO#1	sca-GAL4;Efa6-FL
	Minimum	0.55	0.35	0.23	0.24	0	0			vs.	vs.	vs.	vs.
	25% Percentile	0.6825	0.5375	0.6575	0.75	0.6737	0.6737			Column A	control	wt	sca-GAL4
	Median	0.94	0.945	0.91	0.95	1.063	0.8982
	75% Percentile	1.288	1.583	1.22	1.19	1.329	1.123			Mann Whitney test
	Maximum	1.88	2.55	2.77	2.11	2.392	1.86			P value	0.8878	0.5133	0.0226
										Exact or approximate P value?	Exact	Exact	Approximate
	Mean	1.001	1.079	0.9997	1.014	1	0.879			P value summary	ns	ns	*
	Std. Deviation	0.3668	0.5987	0.4713	0.3983	0.451	0.352			Significantly different (P < 0.05)?	No	No	Yes
	Std. Error of Mean	0.0782	0.1411	0.05554	0.05276	0.04067	0.03161			One- or two-tailed P value?	Two-tailed	Two-tailed	Two-tailed
										Sum of ranks in column A,B	445.5 , 374.5	4542 , 3844	16526 , 14103
	Lower 95% CI of mean	0.8383	0.7812	0.889	0.9085	0.9195	0.8164			Mann-Whitney U	192.5	1914	6353
	Upper 95% CI of mean	1.164	1.377	1.11	1.12	1.081	0.9415
										Difference between medians
	Sum	22.02	19.42	71.98	57.81	123	109			Median of column A	0.94, n=22	0.91, n=72	1.063, n=123
										Median of column B	0.945, n=18	0.95, n=57	0.8982, n=124
										Difference: Actual	0.005	0.04	-0.1648
										Difference: Hodges-Lehmann	0.035	0.04	-0.1236

## Sheet: Fig.6B
	column statistics						Mann-Whitney Test
		wt	Efa6GX6[w-]				Table Analyzed	Lifetime
	Number of values	100	108
							Column B	Efa6GX6[w-]
	Minimum	0.2768	0.1384				vs.	vs.
	25% Percentile	0.5612	0.5612				Column A	wt
	Median	0.9687	0.8418
	75% Percentile	1.263	1.354				Mann Whitney test
	Maximum	2.352	2.946				P value	0.7933
							Exact or approximate P value?	Exact
	Mean	1	1.017				P value summary	ns
	Std. Deviation	0.4823	0.5895				Significantly different (P < 0.05)?	No
	Std. Error of Mean	0.04823	0.05672				One- or two-tailed P value?	Two-tailed
							Sum of ranks in column A,B	10564 , 11172
	Lower 95% CI of mean	0.9043	0.9047				Mann-Whitney U	5286
	Upper 95% CI of mean	1.096	1.13
							Difference between medians
	Sum	100	109.9				Median of column A	0.9687, n=100
							Median of column B	0.8418, n=108
							Difference: Actual	-0.1269
							Difference: Hodges-Lehmann	0

## Sheet: Fig.6C
	column statistics						Mann-Whitney Test
		wt	Efa6GX6[w-]				Table Analyzed	Velocity
	Number of values	100	108
							Column B	Efa6GX6[w-]
	Minimum	0.4652	0.4296				vs.	vs.
	25% Percentile	0.7819	0.8214				Column A	wt
	Median	0.9114	1.007
	75% Percentile	1.153	1.264				Mann Whitney test
	Maximum	2.035	2.34				P value	0.0757
							Exact or approximate P value?	Exact
	Mean	1	1.068				P value summary	ns
	Std. Deviation	0.3225	0.357				Significantly different (P < 0.05)?	No
	Std. Error of Mean	0.03225	0.03435				One- or two-tailed P value?	Two-tailed
							Sum of ranks in column A,B	9680 , 12057
	Lower 95% CI of mean	0.936	1				Mann-Whitney U	4630
	Upper 95% CI of mean	1.064	1.137
							Difference between medians
	Sum	100	115.4				Median of column A	0.9114, n=100
							Median of column B	1.007, n=108
							Difference: Actual	0.09601
							Difference: Hodges-Lehmann	0.06783

## Sheet: Fig.6D
		retro	antero			Table Analyzed	Copy of EB1 comets direction
	wt	29	71
	Efa6GX6[w-]	25	75			P value and statistical significance
						Test	Chi-square
						Chi-square, df	0.4059, 1
						z	0.6371
						P value	0.5241
						P value summary	ns
						One- or two-sided	Two-sided
						Statistically significant (P < 0.05)?	No
						Data analyzed	wt	Efa6GX6[w-]	Total
						retro	29	25	54
						antero	71	75	146
						Total	100	100	200
						Percentage of row total	wt	Efa6GX6[w-]
						retro	53.70%	46.30%
						antero	48.63%	51.37%
						Percentage of column total	wt	Efa6GX6[w-]
						retro	29.00%	25.00%
						antero	71.00%	75.00%
						Percentage of grand total	wt	Efa6GX6[w-]
						retro	14.50%	12.50%
						antero	35.50%	37.50%

## Sheet: Fig.6E
		with	without
	wt	17	83			Table Analyzed	Copy of neuron contain EB1 outside shaft
	Efa6KO#1	42	58
	Efa6-FL	8	92			P value and statistical significance
						Test	Fisher's exact test				Fisher's exact test
						P value	0.0002				0.0856
						P value summary	***				ns
						One- or two-sided	Two-sided				Two-sided
						Statistically significant (P < 0.05)?	Yes				No
						Data analyzed	wt	Efa6KO#1	Total		wt	Efa6-FL	Total
						with	17	42	59		17	8	25
						without	83	58	141		83	92	175
						Total	100	100	200		100	100	200
						Percentage of row total	wt	Efa6KO#1			wt	Efa6-FL
						with	28.81%	71.19%			68.00%	32.00%
						without	58.87%	41.13%			47.43%	52.57%
						Percentage of column total	wt	Efa6KO#1			wt	Efa6-FL
						with	17.00%	42.00%			17.00%	8.00%
						without	83.00%	58.00%			83.00%	92.00%
						Percentage of grand total	wt	Efa6KO#1			wt	Efa6-FL
						with	8.50%	21.00%			8.50%	4.00%
						without	41.50%	29.00%			41.50%	46.00%

## Sheet: Fig.6F
		with	without	all						Table Analyzed	Copy of neuron contain MT protrusion
	wt	79	161	240
	Efa6GX6[w-]	57	63	120						P value and statistical significance
	Efa6GX6[w+]	73	47	120						Test	Chi-square				Chi-square				Chi-square				Chi-square				Chi-square				Chi-square				Chi-square
	shot3/3	53	43	96						Chi-square, df	25.56, 1				7.238, 1				14.29, 1				42.72, 1				15.45, 1				8.039, 1				9.903, 1
	Efa6GX6[w-], shot3/3	55	17	72						z	5.055				2.69				3.78				6.536				3.931				2.835				3.147
	Efa6-FL	13	73	86						P value	<0.0001				0.0071				0.0002				<0.0001				<0.0001				0.0046				0.0016
										P value summary	****				**				***				****				****				**				**
										One- or two-sided	Two-sided				Two-sided				Two-sided				Two-sided				Two-sided				Two-sided				Two-sided
										Statistically significant (P < 0.05)?	Yes				Yes				Yes				Yes				Yes				Yes				Yes
										Data analyzed	wt	Efa6GX6[w+]	Total		wt	Efa6GX6[w-]	Total		wt	shot3/3	Total		wt	Efa6GX6[w-], shot3/3	Total		Efa6GX6[w-]	Efa6GX6[w-], shot3/3	Total		shot3/3	Efa6GX6[w-], shot3/3	Total		wt	Efa6-FL	Total
										with	79	73	152		79	57	136		79	53	132		79	55	134		57	55	112		53	55	108		79	13	92
										without	161	47	208		161	63	224		161	43	204		161	17	178		63	17	80		43	17	60		161	73	234
										Total	240	120	360		240	120	360		240	96	336		240	72	312		120	72	192		96	72	168		240	86	326
										Percentage of row total	wt	Efa6GX6[w+]			wt	Efa6GX6[w-]			wt	shot3/3			wt	Efa6GX6[w-], shot3/3			Efa6GX6[w-]	Efa6GX6[w-], shot3/3			shot3/3	Efa6GX6[w-], shot3/3			wt	Efa6-FL
										with	51.97%	48.03%			58.09%	41.91%			59.85%	40.15%			58.96%	41.04%			50.89%	49.11%			49.07%	50.93%			85.87%	14.13%
										without	77.40%	22.60%			71.88%	28.13%			78.92%	21.08%			90.45%	9.55%			78.75%	21.25%			71.67%	28.33%			68.80%	31.20%
										Percentage of column total	wt	Efa6GX6[w+]			wt	Efa6GX6[w-]			wt	shot3/3			wt	Efa6GX6[w-], shot3/3			Efa6GX6[w-]	Efa6GX6[w-], shot3/3			shot3/3	Efa6GX6[w-], shot3/3			wt	Efa6-FL
										with	32.92%	60.83%			32.92%	47.50%			32.92%	55.21%			32.92%	76.39%			47.50%	76.39%			55.21%	76.39%			32.92%	15.12%
										without	67.08%	39.17%			67.08%	52.50%			67.08%	44.79%			67.08%	23.61%			52.50%	23.61%			44.79%	23.61%			67.08%	84.88%
										Percentage of grand total	wt	Efa6GX6[w+]			wt	Efa6GX6[w-]			wt	shot3/3			wt	Efa6GX6[w-], shot3/3			Efa6GX6[w-]	Efa6GX6[w-], shot3/3			shot3/3	Efa6GX6[w-], shot3/3			wt	Efa6-FL
										with	21.94%	20.28%			21.94%	15.83%			23.51%	15.77%			25.32%	17.63%			29.69%	28.65%			31.55%	32.74%			24.23%	3.99%
										without	44.72%	13.06%			44.72%	17.50%			47.92%	12.80%			51.60%	5.45%			32.81%	8.85%			25.60%	10.12%			49.39%	22.39%

## Sheet: Fig.6G
		column statistics
			ctrl	efa6GX6[w+]	efa6GX6[w-]	shot3/3	efa6GX6[w-], shot3/3	Efa6-FL		elav>GFP pre	shot3/3 elav>GFP pre	shot3/3 elav>Efa6-FL pre
		Number of values	152	61	61	96	71	86		89	97	119						Number of families	1								Number of families	1
																		Number of comparisons per family	5								Number of comparisons per family	3
		Minimum	0	0	0	0	0	0		0	0	0						Alpha	0.05								Alpha	0.05
		25% Percentile	0	0	0	0	2.067	0		0	0.9715	0
		Median	0	3.278	0	2.067	2.067	0		0.5974	1.943	0.6581						Dunn's multiple comparisons test	Mean rank diff.	Significant?	Summary	Adjusted P Value	A-?				Dunn's multiple comparisons test	Mean rank diff.	Significant?	Summary	Adjusted P Value
		75% Percentile	2.067	3.278	3.278	4.133	4.133	0		1.792	3.886	1.974
		Maximum	6.2	16.39	9.833	8.266	12.4	17		4.182	7.772	3.949						ctrl vs. efa6GX6[w+]	-78.53	Yes	***	0.0008	B	efa6GX6[w+]			elav>GFP pre vs. shot3/3 elav>GFP pre	-74.02	Yes	****	<0.0001	H-I
																		ctrl vs. efa6GX6[w-]	-55.85	Yes	*	0.0374	C	efa6GX6[w-]			elav>GFP pre vs. shot3/3 elav>Efa6-FL pre	-3.31	No	ns	>0.9999	H-J
		Mean	0.9999	2.687	2.096	1.937	3.26	0.4581		1	2.364	0.9955						ctrl vs. shot3/3	-59.58	Yes	**	0.0046	D	shot3/3			shot3/3 elav>GFP pre vs. shot3/3 elav>Efa6-FL pre	70.71	Yes	****	<0.0001	I-J
		Std. Deviation	1.529	3.251	2.611	2.2	2.894	2.007		0.9856	1.694	1.083						ctrl vs. efa6GX6[w-], shot3/3	-127	Yes	****	<0.0001	E	efa6GX6[w-], shot3/3
		Std. Error of Mean	0.124	0.4162	0.3343	0.2245	0.3435	0.2164		0.1045	0.172	0.09931						ctrl vs. Efa6-FL	48.43	Yes	*	0.0459	F	Efa6-FL
																											Test details	Mean rank 1	Mean rank 2	Mean rank diff.	n1	n2
		Lower 95% CI of mean	0.7549	1.854	1.427	1.492	2.575	0.0278		0.7925	2.022	0.7988
		Upper 95% CI of mean	1.245	3.519	2.764	2.383	3.945	0.8885		1.208	2.705	1.192						Test details	Mean rank 1	Mean rank 2	Mean rank diff.	n1	n2				elav>GFP pre vs. shot3/3 elav>GFP pre	128.2	202.2	-74.02	89	97
																											elav>GFP pre vs. shot3/3 elav>Efa6-FL pre	128.2	131.5	-3.31	89	119
		Sum	152	163.9	127.8	186	231.5	39.4		89.01	229.3	118.5						ctrl vs. efa6GX6[w+]	228.4	306.9	-78.53	152	61				shot3/3 elav>GFP pre vs. shot3/3 elav>Efa6-FL pre	202.2	131.5	70.71	97	119
																		ctrl vs. efa6GX6[w-]	228.4	284.2	-55.85	152	61
																		ctrl vs. shot3/3	228.4	288	-59.58	152	96
																		ctrl vs. efa6GX6[w-], shot3/3	228.4	355.4	-127	152	71
																		ctrl vs. Efa6-FL	228.4	179.9	48.43	152	86
																		Number of families	1
																		Number of comparisons per family	2
																		Alpha	0.05
																		Dunn's multiple comparisons test	Mean rank diff.	Significant?	Summary	Adjusted P Value
																		efa6GX6[w-] vs. efa6GX6[w-], shot3/3	-29.6	Yes	*	0.0147	C-E
																		shot3/3 vs. efa6GX6[w-], shot3/3	-30.63	Yes	**	0.004	D-E
																		Test details	Mean rank 1	Mean rank 2	Mean rank diff.	n1	n2
																		efa6GX6[w-] vs. efa6GX6[w-], shot3/3	105.7	135.3	-29.6	61	71
																		shot3/3 vs. efa6GX6[w-], shot3/3	104.7	135.3	-30.63	96	71
