# Supplementary material for: Efa6 protects axons and regulates their growth and branching by inhibiting microtubule polymerisation at the cortex
Source: eLife. 2019 Nov 13;8:e50319. doi: 10.7554/eLife.50319 (PMC6884004; doi:10.7554/eLife.50319)
Supplement: Figure 7—source data 1. [file elife-50319-fig7-data1.xlsx]

## Sheet: Fig.7E
	table data								Mann-Whitney Test
		wt	Efa6KO#1	Efa6-FL	Efa6-NtermCAAX				Table Analyzed	Branch no./axon length
	Number of values	65	78	107	94
									Column B	Efa6KO#1	Efa6-FL	Efa6-NtermCAAX
	Minimum	0	0.16	0.09692	0.04				vs.	vs.	vs.	vs.
	25% Percentile	0.47	1.25	0.4802	0.42				Column A	wt	wt	wt
	Median	0.9	1.63	0.69	0.57
	75% Percentile	1.475	2.438	1.103	0.82				Mann Whitney test
	Maximum	2.36	9.21	2.349	2.52				P value	<0.0001	0.0792	0.0006
									Exact or approximate P value?	Exact	Exact	Exact
	Mean	0.9989	1.934	0.7948	0.6586				P value summary	****	ns	***
	Std. Deviation	0.6248	1.251	0.445	0.4321				Significantly different (P < 0.05)?	Yes	No	Yes
	Std. Error of Mean	0.07749	0.1416	0.04302	0.04457				One- or two-tailed P value?	Two-tailed	Two-tailed	Two-tailed
									Sum of ranks in column A,B	3303 , 6994	6179 , 8700	6170 , 6550
	Lower 95% CI of mean	0.8441	1.652	0.7095	0.5701				Mann-Whitney U	1158	2922	2085
	Upper 95% CI of mean	1.154	2.216	0.8801	0.7471
									Difference between medians
	Sum	64.93	150.8	85.05	61.91				Median of column A	0.9, n=65	0.9, n=65	0.9, n=65
									Median of column B	1.63, n=78	0.69, n=107	0.57, n=94
									Difference: Actual	0.73	-0.21	-0.33
									Difference: Hodges-Lehmann	0.8	-0.1525	-0.28

## Sheet: Fig.7L
		Column statistics											One-way Annova
			5D				15D
			wt	Efa6RNAi	Efa6-FL		wt	Efa6RNAi	Efa6-FL				5 Days
		Number of values	254	283	118	0	363	194	385				Number of families	1
													Number of comparisons per family	2
		Minimum	0.1878	0.1878	0.1949		0.2376	0.2533	0.1723				Alpha	0.05
		25% Percentile	0.7513	0.8	0.3897		0.6771	0.9504	0.4166
		Median	0.9391	1.315	0.5846		0.9504	1.354	0.6943				Dunn's multiple comparisons test	Mean rank diff.	Significant?	Summary	Adjusted P Value	A-?
		75% Percentile	1.315	1.69	0.8281		1.267	1.781	0.972
		Maximum	2.442	3.381	1.949		3.293	2.614	2.083				wt vs. Efa6RNAi	-83.69	Yes	****	<0.0001	B	Efa6RNAi
													wt vs. Efa6-FL	114.5	Yes	****	<0.0001	C	Efa6-FL
		Mean	1	1.289	0.6655		1	1.378	0.7173
		Std. Deviation	0.4025	0.6314	0.39		0.4605	0.4979	0.3505
		Std. Error of Mean	0.02525	0.03753	0.0359		0.02417	0.03575	0.01786				Test details	Mean rank 1	Mean rank 2	Mean rank diff.	n1	n2
		Lower 95% CI of mean	0.9503	1.216	0.5944		0.9528	1.307	0.6822				wt vs. Efa6RNAi	312.5	396.1	-83.69	254	283
		Upper 95% CI of mean	1.05	1.363	0.7366		1.048	1.448	0.7524				wt vs. Efa6-FL	312.5	198	114.5	254	118
		Sum	254	364.9	78.53		363.1	267.3	276.2
													15 Days
													Number of families	1
													Number of comparisons per family	2
													Alpha	0.05
													Dunn's multiple comparisons test	Mean rank diff.	Significant?	Summary	Adjusted P Value	E-?
													wt vs. Efa6RNAi	-187.9	Yes	****	<0.0001	F	Efa6RNAi
													wt vs. Efa6-FL	164.5	Yes	****	<0.0001	G	Efa6-FL
													Test details	Mean rank 1	Mean rank 2	Mean rank diff.	n1	n2
													wt vs. Efa6RNAi	500	688	-187.9	363	194
													wt vs. Efa6-FL	500	335.5	164.5	363	385

## Sheet: Fig.7M
		Numbers							Statistics
									P value and statistical significance
		5 days							Test	Chi-square			Chi-square				Chi-square				Chi-square
			control	Efa6-RNAi	Efa6-FL				Chi-square, df	0.05654, 1			15.18, 1				0.9056, 1				0.1714, 1
		with axons	52	32	38				z	0.2378			3.896				0.9516				0.414
		without axons	7	5	29				P value	0.812			<0.0001				0.3413				0.6789
									P value summary	ns			****				ns				ns
		15 days							One- or two-sided	Two-sided			Two-sided				Two-sided				Two-sided
			control	Efa6-RNAi	Efa6-FL				Statistically significant (P < 0.05)?	No			Yes				No				No
		with axons	86	29	51
		without axons	8	1	6				Data analyzed	5D wt	5D EFA6-RNAi	Total	5D wt	5D EFA6-FL	Total		15D wt	15D EFA6-RNAi	Total		15D wt	15D EFA6-FL	Total
									w/ axons	52	32	84	52	38	90		86	29	115		86	51	137
									w/o axons	7	5	12	7	29	36		8	1	9		8	6	14
									Total	59	37	96	59	67	126		94	30	124		94	57	151
									Percentage of row total	5D wt	5D EFA6-RNAi		5D wt	5D EFA6-FL			15D wt	15D EFA6-RNAi			15D wt	15D EFA6-FL
									w/ axons	61.90%	38.10%		57.78%	42.22%			74.78%	25.22%			62.77%	37.23%
									w/o axons	58.33%	41.67%		19.44%	80.56%			88.89%	11.11%			57.14%	42.86%
									Percentage of column total	5D wt	5D EFA6-RNAi		5D wt	5D EFA6-FL			15D wt	15D EFA6-RNAi			15D wt	15D EFA6-FL
									w/ axons	88.14%	86.49%		88.14%	56.72%			91.49%	96.67%			91.49%	89.47%
									w/o axons	11.86%	13.51%		11.86%	43.28%			8.51%	3.33%			8.51%	10.53%
									Percentage of grand total	5D wt	5D EFA6-RNAi		5D wt	5D EFA6-FL			15D wt	15D EFA6-RNAi			15D wt	15D EFA6-FL
									w/ axons	54.17%	33.33%		41.27%	30.16%			69.35%	23.39%			56.95%	33.77%
									w/o axons	7.29%	5.21%		5.56%	23.02%			6.45%	0.81%			5.30%	3.97%
