# Supplementary material for: Efa6 protects axons and regulates their growth and branching by inhibiting microtubule polymerisation at the cortex
Source: eLife. 2019 Nov 13;8:e50319. doi: 10.7554/eLife.50319 (PMC6884004; doi:10.7554/eLife.50319)
Supplement: Figure 8—source data 1. [file elife-50319-fig8-data1.xlsx]

## Sheet: Fig.8I
	column statistics
		wt 6HIV	Efa6GX6[w-] 6HIV	Efa6KO#1 6HIV	sca-GAL4;Efa6-FL 6HIV	wt 5DIV	Efa6GX6[w-] 5DIV	Efa6KO#1 5DIV	elav-GAL4;Efa6-FL 5DIV	elav-GAL4;Efa6-NtermCAAX 5DIV	wt 10DIV	Efa6GX6[w-] 10DIV	Efa6KO#1 10DIV
	Number of values	314	204	68	181	150	91	61	107	147	157	103	67			Column B	Efa6GX6[w-] 6HIV	Efa6GX6[w-] 5DIV	Efa6GX6[w-] 10DIV	Efa6KO#1 6HIV	Efa6KO#1 5DIV	Efa6KO#1 10DIV	sca-GAL4;Efa6-FL 6HIV	elav-GAL4;Efa6-FL 5DIV	elav-GAL4;Efa6-NtermCAAX 5DIV
																vs.	vs.	vs.	vs.	vs.	vs.	vs.	vs.	vs.	vs.
	Minimum	0	0	0	0	0	0	0	0.09692	0	0	0	0			Column A	wt 6HIV	wt 5DIV	wt 10DIV	wt 6HIV	wt 5DIV	wt 10DIV	wt 6HIV	wt 5DIV	wt 5DIV
	25% Percentile	0	0	0	0	0	0	0.07128	0.4802	0	0	0	0.473
	Median	0	0.3124	0.4063	0	0	0	1.084	0.69	0	0	1.575	2.803			Mann Whitney test
	75% Percentile	1.565	2.516	1.668	1.135	0.9444	2.439	3.652	1.103	0.7603	1.126	4.312	5.464			P value	0.0094	0.0668	<0.0001	0.068	<0.0001	<0.0001	0.1553	<0.0001	0.1644
	Maximum	12.62	13.8	10.52	5.25	11.92	30.14	19.93	2.349	9.51	14.25	30.14	16.94			Exact or approximate P value?	Approximate	Exact	Approximate	Exact	Exact	Exact	Approximate	Approximate	Approximate
																P value summary	**	ns	****	ns	****	****	ns	****	ns
	Mean	1	1.618	1.288	0.6734	1	1.806	2.308	0.7948	0.7727	1	3.246	4.045			Significantly different (P < 0.05)?	Yes	No	Yes	No	Yes	Yes	No	Yes	No
	Std. Deviation	1.725	2.378	2.121	1.119	2.108	3.896	3.325	0.445	1.567	2.117	4.914	4.517			One- or two-tailed P value?	Two-tailed	Two-tailed	Two-tailed	Two-tailed	Two-tailed	Two-tailed	Two-tailed	Two-tailed	Two-tailed
	Std. Error of Mean	0.09733	0.1665	0.2572	0.08314	0.1721	0.4085	0.4257	0.04302	0.1292	0.1689	0.4842	0.5519			Sum of ranks in column A,B	77505 , 56916	17304 , 11857	17797 , 16133	58746 , 14407	14053 , 8314	14919 , 10281	79822 , 42938	15634 , 17519	21424 , 22829
																Mann-Whitney U	28050	5979	5394	9291	2728	2516	26467	4309	10099
	Lower 95% CI of mean	0.8085	1.29	0.7744	0.5094	0.66	0.9945	1.456	0.7095	0.5174	0.6665	2.286	2.943
	Upper 95% CI of mean	1.192	1.947	1.801	0.8375	1.34	2.617	3.159	0.8801	1.028	1.334	4.206	5.147			Difference between medians
																Median of column A	0, n=314	0, n=150	0, n=157	0, n=314	0, n=150	0, n=157	0, n=314	0, n=150	0, n=150
	Sum	314	330.2	87.56	121.9	150	164.3	140.8	85.05	113.6	157	334.3	271			Median of column B	0.3124, n=204	0, n=91	1.575, n=103	0.4063, n=68	1.084, n=61	2.803, n=67	0, n=181	0.69, n=107	0, n=147
																Difference: Actual	0.3124	0	1.575	0.4063	1.084	2.803	0	0.69	0
																Difference: Hodges-Lehmann	0	0	0.7917	0	0.6343	2.057	0	0.5342	0

## Sheet: Fig.8J
	column statistics								Mann Whitney Test
		6HIV	5DIV	10DIV					Column B	5DIV	10DIV	10DIV
	Number of values	174	73	73					vs.	vs.	vs.	vs.
									Column A	6HIV	5DIV	6HIV
	Minimum	0	0	0
	25% Percentile	0	0	0					Mann Whitney test
	Median	0.6634	1.181	1.541					P value	0.0279	0.5688	0.0147
	75% Percentile	2.375	4.181	7.981					Exact or approximate P value?	Exact	Exact	Exact
	Maximum	11.99	37.15	79.05					P value summary	*	ns	*
									Significantly different (P < 0.05)?	Yes	No	Yes
	Mean	1.573	2.971	5.765					One- or two-tailed P value?	Two-tailed	Two-tailed	Two-tailed
	Std. Deviation	2.344	5.088	11.48					Sum of ranks in column A,B	20492 , 10136	5224 , 5508	20377 , 10251
	Std. Error of Mean	0.1777	0.5955	1.344					Mann-Whitney U	5267	2523	5152
	Lower 95% CI of mean	1.222	1.784	3.086					Difference between medians
	Upper 95% CI of mean	1.923	4.158	8.444					Median of column A	0.6634, n=174	1.181, n=73	0.6634, n=174
									Median of column B	1.181, n=73	1.541, n=73	1.541, n=73
	Sum	273.6	216.9	420.9					Difference: Actual	0.5172	0.3606	0.8778
									Difference: Hodges-Lehmann	0.1153	0	0.1848

## Sheet: Fig.8K
	column statistics										1way Anova
		control 1	control 2	EfaRNAi	control 1	control 2	EfaRNAi				3DIV uninduced
	Number of values	92	79	77	68	86	58				Number of families	1
											Number of comparisons per family	3
	Minimum	0	0	0	0	0	0				Alpha	0.05
	25% Percentile	0	0	0	0	0	4.162
	Median	0	0	0	0	0	11.03				Dunn's multiple comparisons test	Mean rank diff.	Significant?	Summary	Adjusted P Value
	75% Percentile	0	0	0.3784	2.061	2.723	25.42
	Maximum	24.85	10.48	8.686	31.82	40.56	76.2				control 1 uninduced vs. control 2 uninduced	-0.9049	No	ns	>0.9999	A-B
											control 1 uninduced vs. EfaRNAi uninduced	-11.71	No	ns	0.3667	A-C
	Mean	1	0.7562	0.8259	2.869	2.773	17.5				control 2 uninduced vs. EfaRNAi uninduced	-10.8	No	ns	0.507	B-C
	Std. Deviation	3.509	2.275	1.95	6.725	7.06	18.69
	Std. Error of Mean	0.3659	0.256	0.2222	0.8155	0.7613	2.454
											Test details	Mean rank 1	Mean rank 2	Mean rank diff.	n1	n2
	Lower 95% CI of mean	0.2732	0.2466	0.3834	1.241	1.26	12.58
	Upper 95% CI of mean	1.727	1.266	1.268	4.497	4.287	22.41				control 1 uninduced vs. control 2 uninduced	120.6	121.5	-0.9049	92	79
											control 1 uninduced vs. EfaRNAi uninduced	120.6	132.3	-11.71	92	77
	Sum	92	59.74	63.59	195.1	238.5	1015				control 2 uninduced vs. EfaRNAi uninduced	121.5	132.3	-10.8	79	77
											3DIV uninduced + 4 DIV induced
											Number of families	1
											Number of comparisons per family	3
											Alpha	0.05
											Dunn's multiple comparisons test	Mean rank diff.	Significant?	Summary	Adjusted P Value
											control 1 induced vs. control 2 induced	-1.256	No	ns	>0.9999	D-E
											control 1 induced vs. EfaRNAi induced	-66.38	Yes	****	<0.0001	D-F
											control 2 induced vs. EfaRNAi induced	-65.12	Yes	****	<0.0001	E-F
											Test details	Mean rank 1	Mean rank 2	Mean rank diff.	n1	n2
											control 1 induced vs. control 2 induced	87.83	89.09	-1.256	68	86
											control 1 induced vs. EfaRNAi induced	87.83	154.2	-66.38	68	58
											control 2 induced vs. EfaRNAi induced	89.09	154.2	-65.12	86	58

## Sheet: Fig.8L
	Column statistics													1-way Anova
		wt 6HIV	shot3/+ 6HIV	Efa6RNAi 6HIV	shot3/+,Efa6RNAi 6HIV		wt 5DIV	shot3/+ 5DIV	Efa6RNAi 5DIV	shot3/+,Efa6RNAi 5DIV				6HIV
	Number of values	459	145	291	282	0	196	251	155	221				Number of families	1
														Number of comparisons per family	6
	Minimum	0	0	0	0		0	0	0	0				Alpha	0.05
	25% Percentile	0	0	0	0		0	0	0.13	0.25
	Median	0	0	0	1.161		0.485	0.51	0.7	1.27				Dunn's multiple comparisons test	Mean rank diff.	Significant?	Summary	Adjusted P Value
	75% Percentile	1.38	1.46	2.499	3.344		1.368	1.55	1.93	2.36
	Maximum	14.69	8.6	16.74	17.28		8.1	13.04	7.66	11.34				wt 6HIV vs. shot3/+ 6HIV	-6.752	No	ns	>0.9999
														wt 6HIV vs. Efa6RNAi 6HIV	-82.81	Yes	**	0.0027
	Mean	0.9999	1.094	1.632	2.076		0.9999	1.263	1.304	1.727				wt 6HIV vs. shot3/+,Efa6RNAi 6HIV	-171.9	Yes	****	<0.0001
	Std. Deviation	1.93	2.001	2.583	2.682		1.409	1.966	1.631	1.905				shot3/+ 6HIV vs. Efa6RNAi 6HIV	-76.05	No	ns	0.1047
	Std. Error of Mean	0.0901	0.1662	0.1514	0.1597		0.1006	0.1241	0.131	0.1282				shot3/+ 6HIV vs. shot3/+,Efa6RNAi 6HIV	-165.1	Yes	****	<0.0001
														Efa6RNAi 6HIV vs. shot3/+,Efa6RNAi 6HIV	-89.05	Yes	**	0.0043
	Lower 95% CI of mean	0.8228	0.7651	1.334	1.762		0.8014	1.019	1.045	1.474
	Upper 95% CI of mean	1.177	1.422	1.93	2.391		1.198	1.508	1.563	1.98
														Test details	Mean rank 1	Mean rank 2	Mean rank diff.	n1	n2
	Sum	459	158.6	474.8	585.5		196	317.1	202.1	381.7
														wt 6HIV vs. shot3/+ 6HIV	526.5	533.3	-6.752	459	145
														wt 6HIV vs. Efa6RNAi 6HIV	526.5	609.3	-82.81	459	291
														wt 6HIV vs. shot3/+,Efa6RNAi 6HIV	526.5	698.4	-171.9	459	282
														shot3/+ 6HIV vs. Efa6RNAi 6HIV	533.3	609.3	-76.05	145	291
														shot3/+ 6HIV vs. shot3/+,Efa6RNAi 6HIV	533.3	698.4	-165.1	145	282
														Efa6RNAi 6HIV vs. shot3/+,Efa6RNAi 6HIV	609.3	698.4	-89.05	291	282
														5DIV
														Number of families	1
														Number of comparisons per family	6
														Alpha	0.05
														Dunn's multiple comparisons test	Mean rank diff.	Significant?	Summary	Adjusted P Value
														wt 5DIV vs. shot3/+ 5DIV	-18.78	No	ns	>0.9999
														wt 5DIV vs. Efa6RNAi 5DIV	-55.94	No	ns	0.1625
														wt 5DIV vs. shot3/+,Efa6RNAi 5DIV	-116.8	Yes	****	<0.0001
														shot3/+ 5DIV vs. Efa6RNAi 5DIV	-37.16	No	ns	0.734
														shot3/+ 5DIV vs. shot3/+,Efa6RNAi 5DIV	-98.02	Yes	****	<0.0001
														Efa6RNAi 5DIV vs. shot3/+,Efa6RNAi 5DIV	-60.86	No	ns	0.0103
														Test details	Mean rank 1	Mean rank 2	Mean rank diff.	n1	n2
														wt 5DIV vs. shot3/+ 5DIV	364.4	383.2	-18.78	196	251
														wt 5DIV vs. Efa6RNAi 5DIV	364.4	420.3	-55.94	196	155
														wt 5DIV vs. shot3/+,Efa6RNAi 5DIV	364.4	481.2	-116.8	196	221
														shot3/+ 5DIV vs. Efa6RNAi 5DIV	383.2	420.3	-37.16	251	155
														shot3/+ 5DIV vs. shot3/+,Efa6RNAi 5DIV	383.2	481.2	-98.02	251	221
														Efa6RNAi 5DIV vs. shot3/+,Efa6RNAi 5DIV	420.3	481.2	-60.86	155	221

## Sheet: Fig.8M
	Column statistics									1-way ANOVA
		wt	efa6-/-	shot-/-	efa6-/- shot-/-					Number of families	1
	Number of values	370	370	392	311					Number of comparisons per family	6
										Alpha	0.05
	Minimum	0	0	0	0
	25% Percentile	0	0	0	1.157					Dunn's multiple comparisons test	Mean rank diff.	Significant?	Summary	Adjusted P Value
	Median	0	0.3089	1.459	3.324
	75% Percentile	1.524	1.897	3.51	5.758					wt vs. efa6-/-	-70.48	No	*	0.0133
	Maximum	13.19	17.71	16.93	27.8					wt vs. shot-/-	-241	Yes	****	<0.0001
										wt vs. efa6-/- shot-/-	-428	Yes	****	<0.0001
	Mean	1.003	1.558	2.39	4.164					efa6-/- vs. shot-/-	-170.5	Yes	****	<0.0001
	Std. Deviation	1.721	2.707	2.836	4.261					efa6-/- vs. efa6-/- shot-/-	-357.5	Yes	****	<0.0001
	Std. Error of Mean	0.0895	0.1407	0.1432	0.2416					shot-/- vs. efa6-/- shot-/-	-187	Yes	****	<0.0001
	Lower 95% CI of mean	0.8267	1.281	2.108	3.688
	Upper 95% CI of mean	1.179	1.835	2.671	4.639					Test details	Mean rank 1	Mean rank 2	Mean rank diff.	n1	n2
	Sum	371	576.4	936.8	1295					wt vs. efa6-/-	546.2	616.7	-70.48	370	370
										wt vs. shot-/-	546.2	787.2	-241	370	392
										wt vs. efa6-/- shot-/-	546.2	974.2	-428	370	311
										efa6-/- vs. shot-/-	616.7	787.2	-170.5	370	392
										efa6-/- vs. efa6-/- shot-/-	616.7	974.2	-357.5	370	311
										shot-/- vs. efa6-/- shot-/-	787.2	974.2	-187	392	311

## Sheet: Fig.8N
	Column statistics									1-way ANOVA
		GFP	shot 3, GFP	shot 3, Efa6-FL-GFP						Number of families	1
	Number of values	145	152	202						Number of comparisons per family	3
										Alpha	0.05
	Minimum	0	0	0
	25% Percentile	0	1.367	0						Dunn's multiple comparisons test	Mean rank diff.	Significant?	Summary	Adjusted P Value
	Median	0.08453	3.917	0.308
	75% Percentile	1.071	10.38	1.501						GFP vs. shot 3, GFP	-152.7	Yes	****	<0.0001	A-B
	Maximum	14.17	50.6	44.44						GFP vs. shot 3, Efa6-FL-GFP	-23.42	No	ns	0.3774	A-C
										shot 3, GFP vs. shot 3, Efa6-FL-GFP	129.3	Yes	****	<0.0001	B-C
	Mean	0.9998	6.628	2.125
	Std. Deviation	2.182	8.009	5.16
	Std. Error of Mean	0.1812	0.6496	0.3631						Test details	Mean rank 1	Mean rank 2	Mean rank diff.	n1	n2
	Lower 95% CI of mean	0.6417	5.344	1.409						GFP vs. shot 3, GFP	194	346.7	-152.7	145	152
	Upper 95% CI of mean	1.358	7.911	2.841						GFP vs. shot 3, Efa6-FL-GFP	194	217.4	-23.42	145	202
										shot 3, GFP vs. shot 3, Efa6-FL-GFP	346.7	217.4	129.3	152	202
	Sum	145	1007	429.2
