# Supplementary material for: Efa6 protects axons and regulates their growth and branching by inhibiting microtubule polymerisation at the cortex
Source: eLife. 2019 Nov 13;8:e50319. doi: 10.7554/eLife.50319 (PMC6884004; doi:10.7554/eLife.50319)
Supplement: Figure 9—source data 1. [file elife-50319-fig9-data1.xlsx]

## Sheet: Fig.9D
	Column statistics									1-way ANOVA
		control	Efa6-RNAi	shot3/+	shot3/+, Efa6-RNAi
	Number of values	542	466	296	271					Number of families	1
										Number of comparisons per family	6
	Minimum	0	0	0	0					Alpha	0.05
	25% Percentile	0	0	0	0
	Median	0	0	0	1					Dunn's multiple comparisons test	Mean rank diff.	Significant?	Summary	Adjusted P Value
	75% Percentile	0	1	1	2
	Maximum	6	7	4	5					control vs. Efa6-RNAi	-159.4	Yes	****	<0.0001	A-B
										control vs. shot3/+	-184.7	Yes	****	<0.0001	A-C
	Mean	0.3044	0.6481	0.6655	0.9668					control vs. shot3/+, Efa6-RNAi	-284.8	Yes	****	<0.0001	A-D
	Std. Deviation	0.723	0.9906	0.913	1.146					Efa6-RNAi vs. shot3/+	-25.28	No	ns	>0.9999	B-C
	Std. Error of Mean	0.03105	0.04589	0.05307	0.06962					Efa6-RNAi vs. shot3/+, Efa6-RNAi	-125.3	Yes	***	0.0001	B-D
										shot3/+ vs. shot3/+, Efa6-RNAi	-100.1	Yes	*	0.0131	C-D
	Lower 95% CI of mean	0.2434	0.5579	0.5611	0.8297
	Upper 95% CI of mean	0.3654	0.7382	0.77	1.104
										Test details	Mean rank 1	Mean rank 2	Mean rank diff.	n1	n2
	Sum	165	302	197	262
										control vs. Efa6-RNAi	657.1	816.6	-159.4	542	466
										control vs. shot3/+	657.1	841.8	-184.7	542	296
										control vs. shot3/+, Efa6-RNAi	657.1	941.9	-284.8	542	271
										Efa6-RNAi vs. shot3/+	816.6	841.8	-25.28	466	296
										Efa6-RNAi vs. shot3/+, Efa6-RNAi	816.6	941.9	-125.3	466	271
										shot3/+ vs. shot3/+, Efa6-RNAi	841.8	941.9	-100.1	296	271

## Sheet: Fig.9E
	Column statistics								1-way ANOVA
		control	Efa6-RNAi	shot3/+	shot3/+, Efa6-RNAi
	Number of values	544	468	294	267				Number of families	1
									Number of comparisons per family	6
	Minimum	0	0	0	0				Alpha	0.05
	25% Percentile	0	0	0	0
	Median	0	0	0	0				Dunn's multiple comparisons test	Mean rank diff.	Significant?	Summary	Adjusted P Value
	75% Percentile	0	0	0	1
	Maximum	4	6	3	5				control vs. Efa6-RNAi	-69.55	Yes	***	0.0009	A-B
									control vs. shot3/+	-53.17	No	ns	0.071	A-C
	Mean	0.1287	0.2329	0.1939	0.4869				control vs. shot3/+, Efa6-RNAi	-149.1	Yes	****	<0.0001	A-D
	Std. Deviation	0.4521	0.5773	0.4744	0.963				Efa6-RNAi vs. shot3/+	16.38	No	ns	>0.9999	B-C
	Std. Error of Mean	0.01938	0.02668	0.02767	0.05894				Efa6-RNAi vs. shot3/+, Efa6-RNAi	-79.56	Yes	**	0.0023	B-D
									shot3/+ vs. shot3/+, Efa6-RNAi	-95.95	Yes	***	0.0006	C-D
	Lower 95% CI of mean	0.0906	0.1805	0.1394	0.3708
	Upper 95% CI of mean	0.1668	0.2853	0.2483	0.6029
									Test details	Mean rank 1	Mean rank 2	Mean rank diff.	n1	n2
	Sum	70	109	57	130
									control vs. Efa6-RNAi	731.1	800.6	-69.55	544	468
									control vs. shot3/+	731.1	784.2	-53.17	544	294
									control vs. shot3/+, Efa6-RNAi	731.1	880.2	-149.1	544	267
									Efa6-RNAi vs. shot3/+	800.6	784.2	16.38	468	294
									Efa6-RNAi vs. shot3/+, Efa6-RNAi	800.6	880.2	-79.56	468	267
									shot3/+ vs. shot3/+, Efa6-RNAi	784.2	880.2	-95.95	294	267
